# Supplementary material
Source: PubMed Central journal article supplement (PMC7017404)
Supplement: ao9b03785_si_001.pdf [file ao9b03785_si_001.pdf]

## **Supplementary Information**

### **Simultaneous Elimination of Dyes and Antibiotic with a Hydrothermally Generated NiAlTi Layered Double Hydroxide Adsorbent**

**Garima Rathee<sup>1</sup>, Nidhi Singh<sup>1</sup> and Ramesh Chandra<sup>1\*,2</sup>**

Author affiliations:

*1*- Drug Discovery & Development Laboratory, Department of Chemistry, University of Delhi, Delhi-110007, India

*2*- Dr. B. R. Ambedkar Centre for Biomedical Research, University of Delhi, Delhi-110007, India.

**\*Correspondance:**

**Prof. Ramesh Chandra, Drug Discovery and Development Laboratory, Department of Chemistry, University of Delhi, Delhi-110007, India.**

E-mail: [acbrdu@hotmail.com](mailto:acbrdu@hotmail.com).

**Table of contents:**

1. XRD parameters.....Page S3
2. EDAX analysis of NiAlTi LDH .....Page S3
3. UV-visible spectra of time dependent adsorption.....Page S4
4.  $R_L$  v/s  $C_0$  plot.....Page S4
5. Structures and properties of adsorbates tested.....Page S5

**Table S1. XRD parameters:**

| <b>h</b> | <b>k</b> | <b>l</b>  | <b>2<math>\theta</math>/deg</b> | <b>d-spacing/nm</b> | <b>Relative Intensity</b> |
|----------|----------|-----------|---------------------------------|---------------------|---------------------------|
| 0        | 0        | 3         | 11.44                           | 0.773               | 156.41                    |
| 0        | 0        | 6         | 23.25                           | 0.382               | 79.21                     |
| 0        | 0        | 9         | 39.59                           | 0.227               | 56.07                     |
| 1        | 1        | 0         | 25.08                           | 0.355               | 47.15                     |
| 1        | 0        | 0         | 35.00                           | 0.256               | 80.66                     |
| 1        | 0        | 1         | 37.89                           | 0.238               | 35.76                     |
| 0        | 1        | 8         | 47.09                           | 0.193               | 52.64                     |
| 1        | 1        | 3         | 62.48                           | 0.185               | 40.19                     |
| 1        | 0        | <u>13</u> | 75.17                           | 0.126               | 28.57                     |

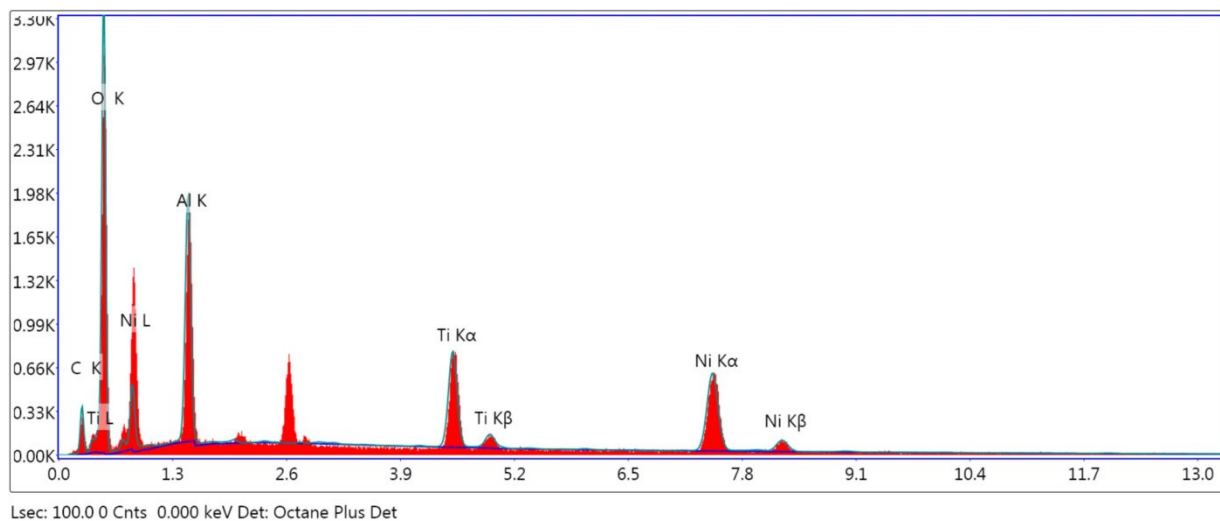

**Figure S1. EDAX analysis of NiAlTi LDH.**

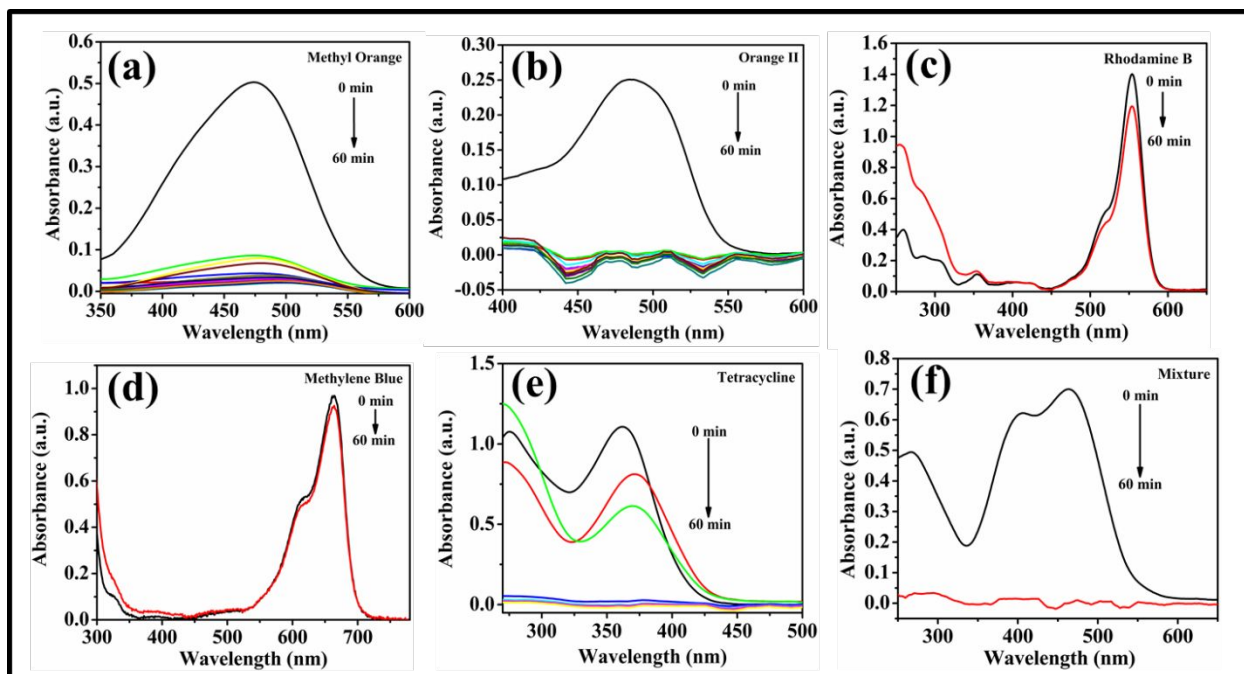

**Figure S2.** UV-visible spectra of time dependent adsorption of various dyes and antibiotic over NiAlTi LDH (Methyl orange (a), Orange II (b), Rhodamine B (c), Methylene Blue (d), Tetracycline (e) and mixture of Methyl orange and Tetracycline(f)).

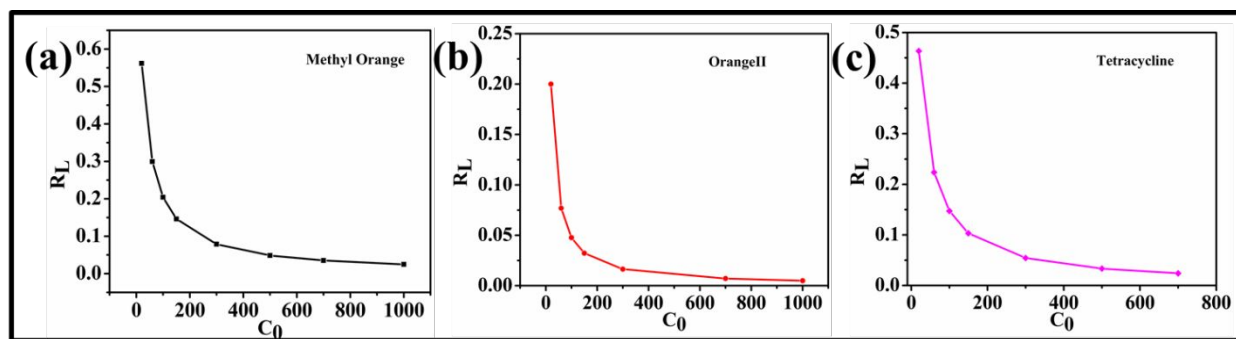

**Figure S3.**  $R_L$  v/s  $C_0$  plot for adsorption of Methyl orange (a), Orange II (b) and Tetracycline (c) over NiAlTi LDH.

**Table S2. Structures and properties of adsorbates tested:**

| <b>Adsorbate</b>      | <b>Structure</b>                                                                  | <b>Nature</b> | <b>Molecular Formula</b> | <b>Molecular Mass (g/mol)</b> |
|-----------------------|-----------------------------------------------------------------------------------|---------------|--------------------------|-------------------------------|
| <b>Methyl Orange</b>  | 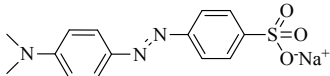 | Anionic dye   | $C_{14}H_{14}N_3NaO_3S$  | 327.34                        |
| <b>Orange II</b>      |  | Anionic dye   | $C_{16}H_{11}N_2NaO_4S$  | 350.324                       |
| <b>Methylene Blue</b> |  | Cationic dye  | $C_{16}H_{18}ClN_3S$     | 319.85                        |
| <b>Rhodamine B</b>    |  | Cationic dye  | $C_{28}H_{31}ClN_2O_3$   | 479.02                        |
| <b>Tetracycline</b>   |  | Antibiotic    | $C_{22}H_{24}N_2O_8$     | 444.43                        |
